# Supplementary material for: In Vivo Evaluation of Safety and Efficacy of Ethyl Cellulose-Ethanol Tissue Ablation in a Swine Cervix Model
Source: MDPI journal article supplement (doi:10.3390/bioengineering10111246), 2023-10-25
Supplement: s1 [file s1]

Article

# In Vivo Evaluation of Safety and Efficacy of Ethyl Cellulose-Ethanol Tissue Ablation in a Swine Cervix Model

Tri T. Quang <sup>1</sup>, Jeffrey Yang <sup>1,2</sup>, Michele L. Kaluziński <sup>1</sup>, Anna Parrish <sup>1</sup>, Asma Farooqui <sup>1</sup>, David Katz <sup>3,4</sup>, Brian Crouch <sup>3</sup>, Nimmi Ramanujam <sup>3,5,6</sup>, and Jenna L. Mueller <sup>1,7,8,\*</sup>

<sup>1</sup> Fischell Department of Bioengineering, University of Maryland, College Park, MD 20742, USA; tritquang@gmail.com (T.T.Q.); jyang12@umd.edu (J.Y.); mkaluzi4@umd.edu (M.L.K.); annagparrish@gmail.com (A.P.); asmafarooqui101@gmail.com (A.F.)

<sup>2</sup> Center for Interventional Oncology, Radiology and Imaging Sciences, NIH Clinical Center, National Cancer Institute, National Institutes of Health, Bethesda, MD 20892, USA

<sup>3</sup> Department of Biomedical Engineering, Duke University, Durham, NC 27708, USA; dkatz@duke.edu (D.K.); brian.crouch@duke.edu (B.C.); nimmi.ramanujam@duke.edu (N.R.)

<sup>4</sup> Department of Obstetrics and Gynecology, Duke University School of Medicine, Durham, NC 27710, USA

<sup>5</sup> Duke Global Health Institute, Duke University, Durham, NC 27710, USA

<sup>6</sup> Department of Pharmacology and Cancer Biology, Duke University, Durham, NC 27708, USA

<sup>7</sup> Department of OB-GYN & Reproductive Science, University of Maryland School of Medicine, Baltimore, MD 21201, USA

<sup>8</sup> Marlene and Stewart Greenebaum Cancer Center, University of Maryland School of Medicine, Baltimore, MD 21201, USA

\* Correspondence: mueller7@umd.edu (J.L.M.); Tel.: +1-301-405-8268; Fax: +1-301-405-9953

## Supplementary Figure:

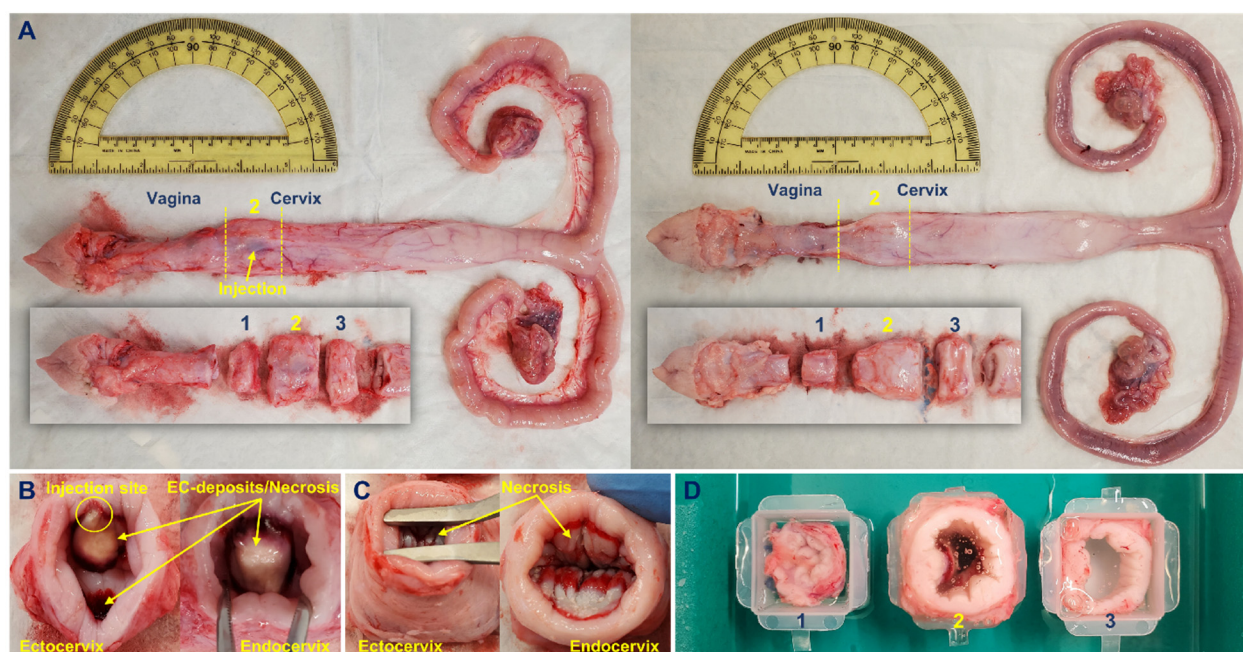

**Figure S1.** Extraction of treatment zone from harvested reproductive tracts post-ablation. (A) Reproductive tract excised 24 hours following EC-ethanol ablation (left) and thermocoagulation (right). Cervical section 2 contains necrotic regions. (B) Necrotic regions caused by EC-ethanol ablation from ectocervix and endocervix viewpoints. (C) Necrotic regions caused by thermocoagulation from ectocervix and endocervix viewpoints. (D) Flash freezing of cervical tissue.
